# Supplementary figures and images for: Diffuse Midline Gliomas With Histone H3 K27M Mutation in Adults and Children: A Retrospective Series of 164 Cases
Source: PubMed Central journal article supplement — Am J Surg Pathol. 2022 Apr 13;46(6):863–71. doi: 10.1097/PAS.0000000000001897 (PMC9093723; doi:10.1097/pas.0000000000001897), 2022-04-13

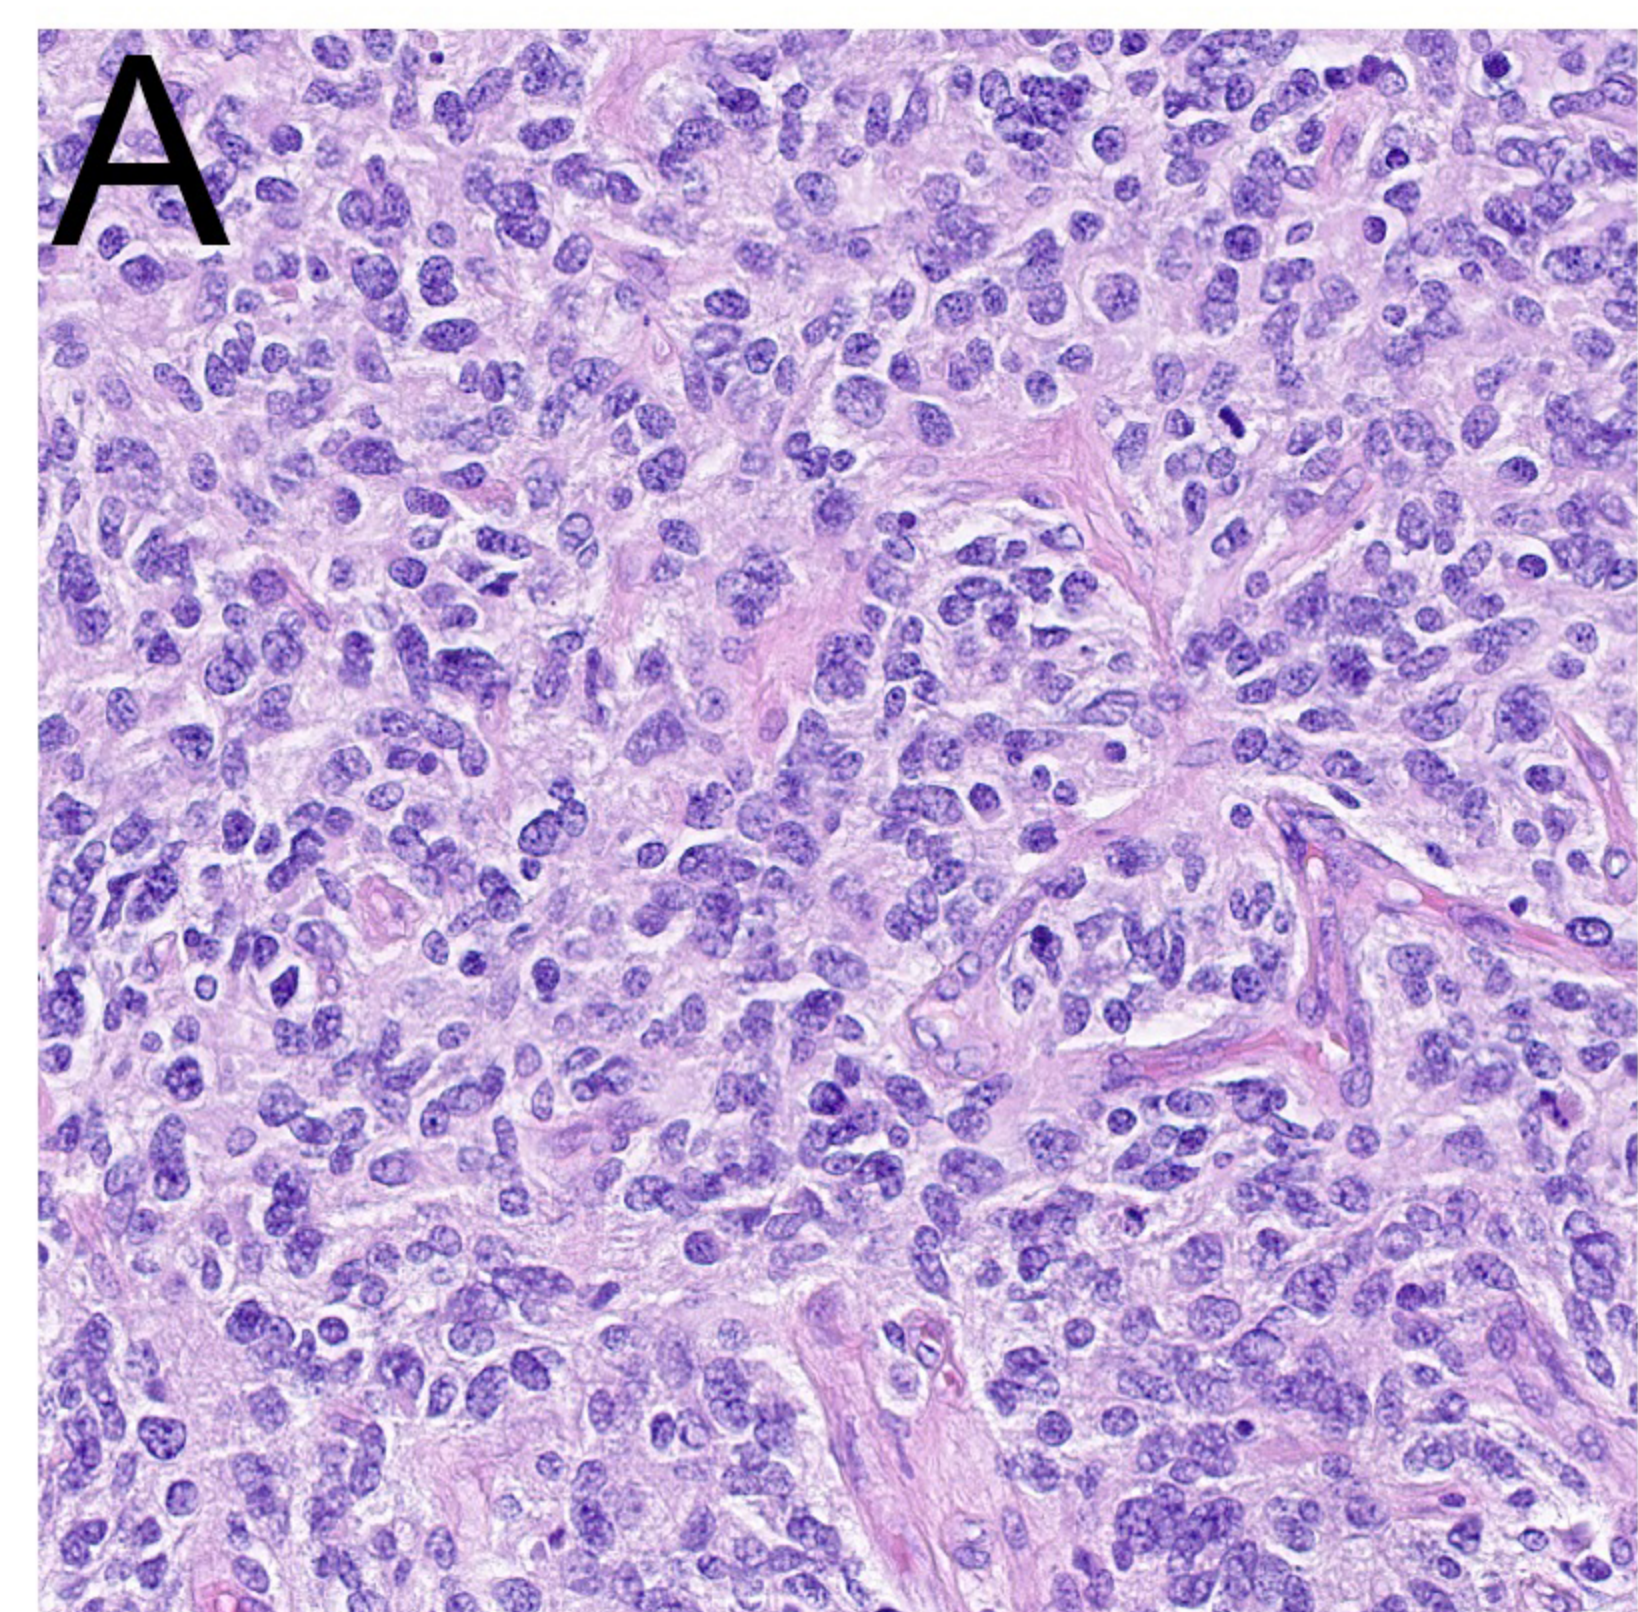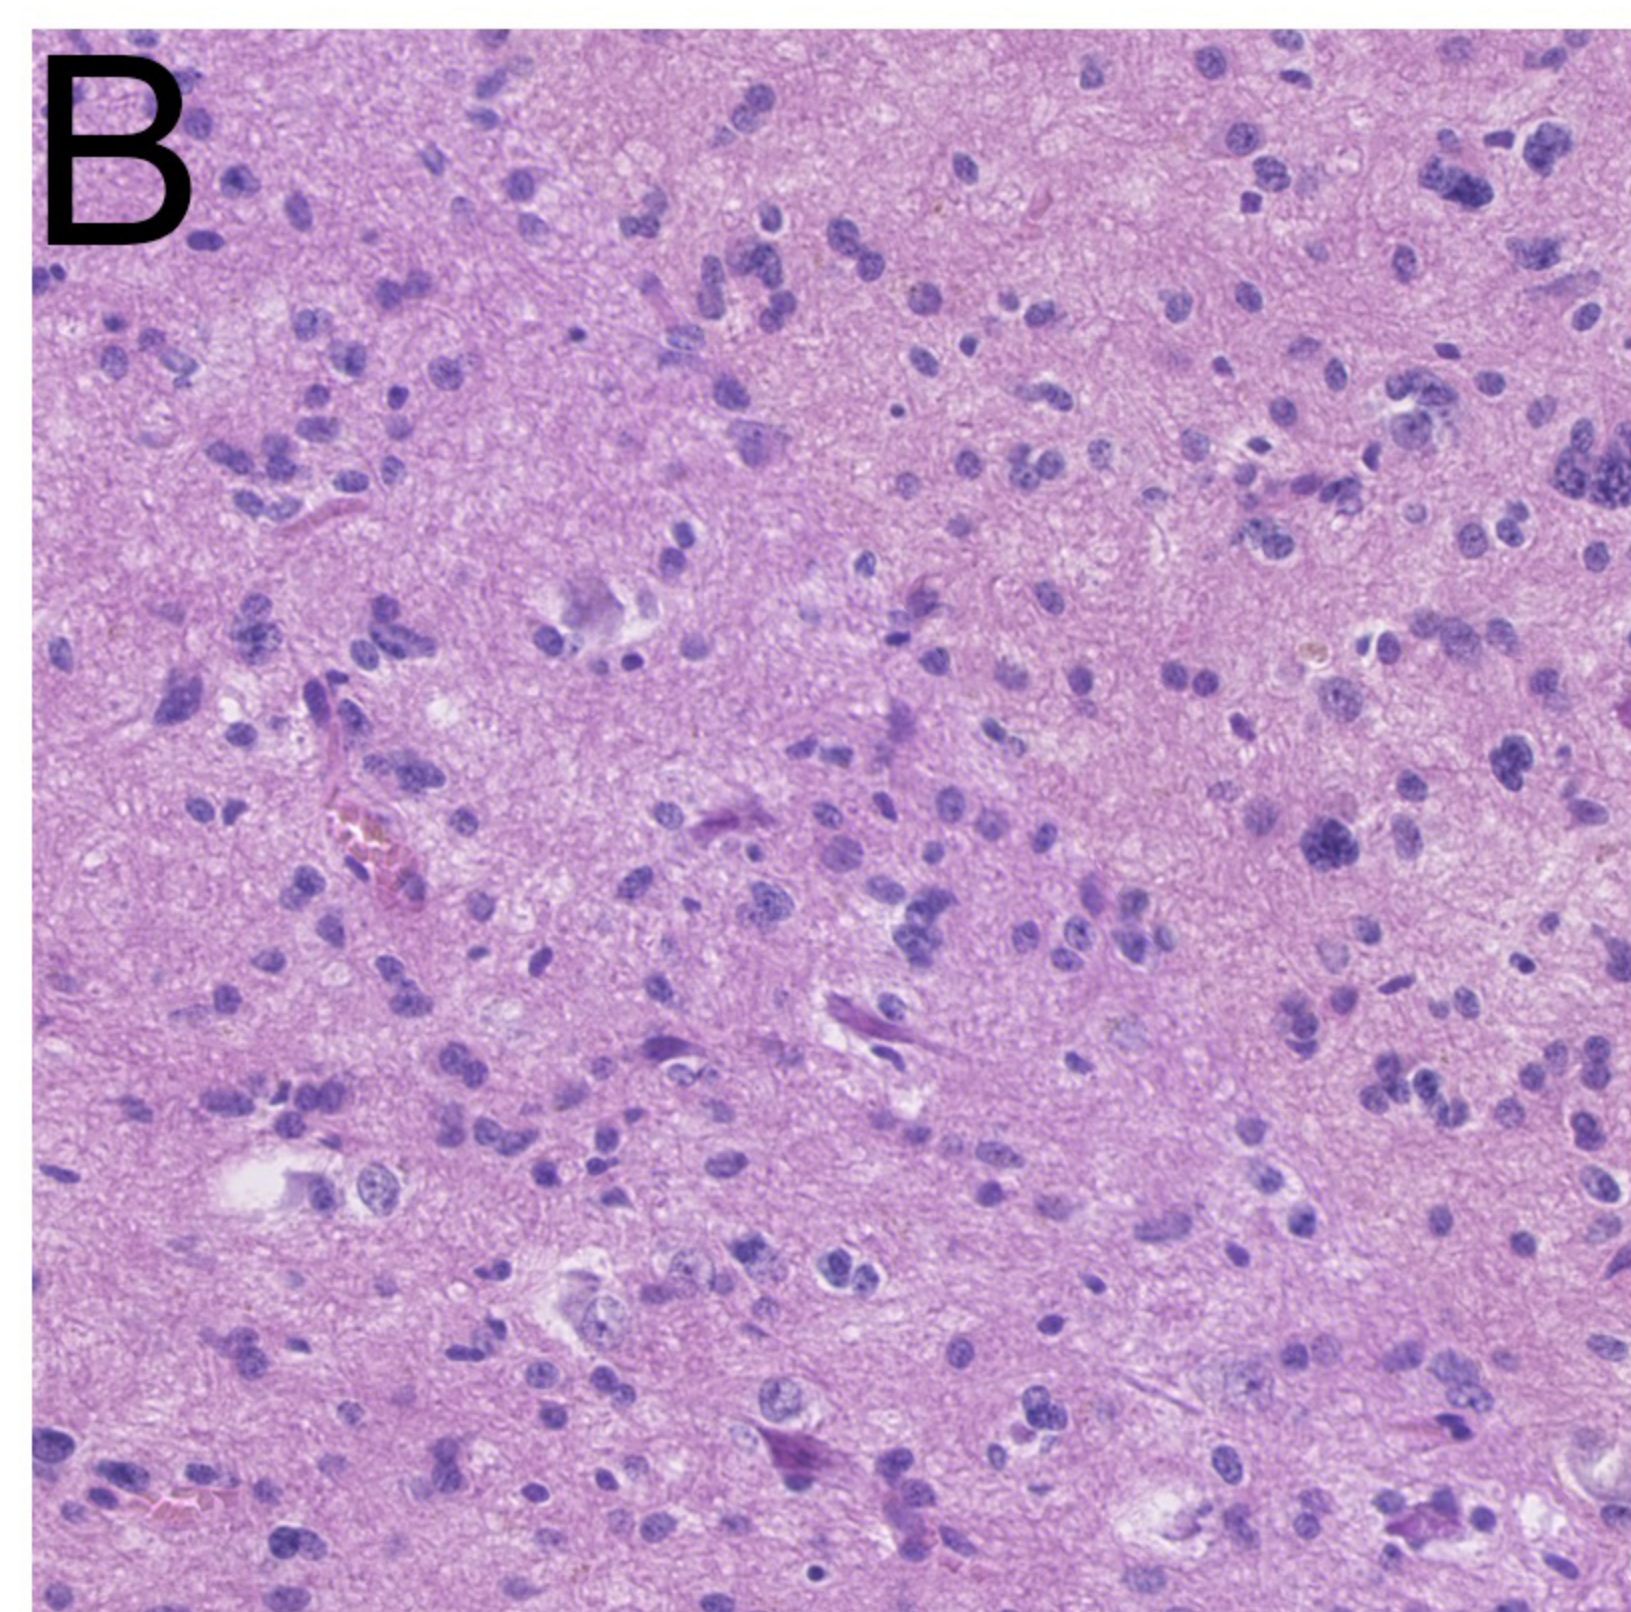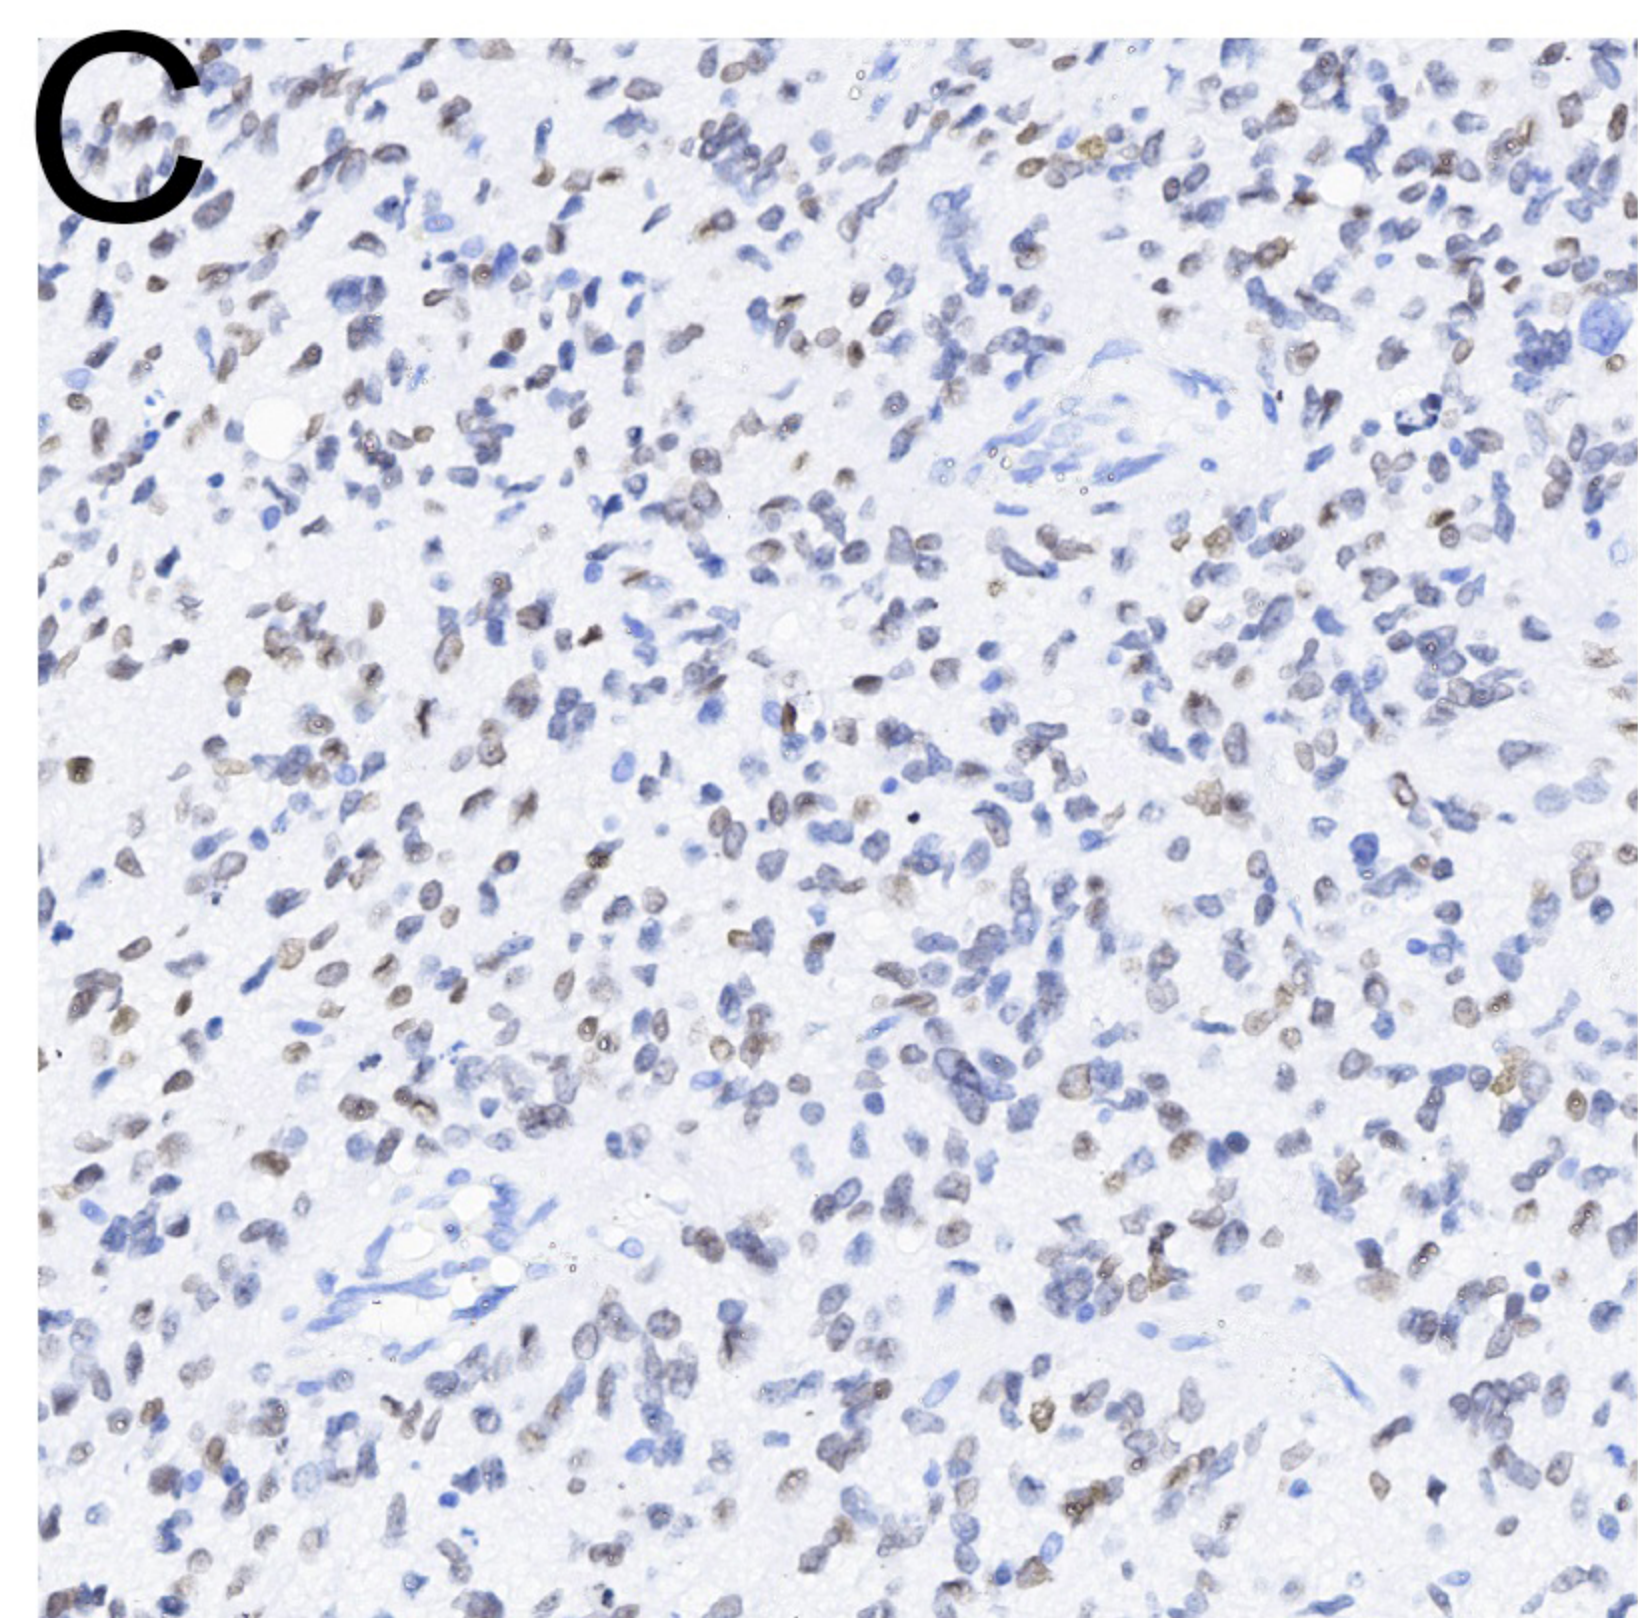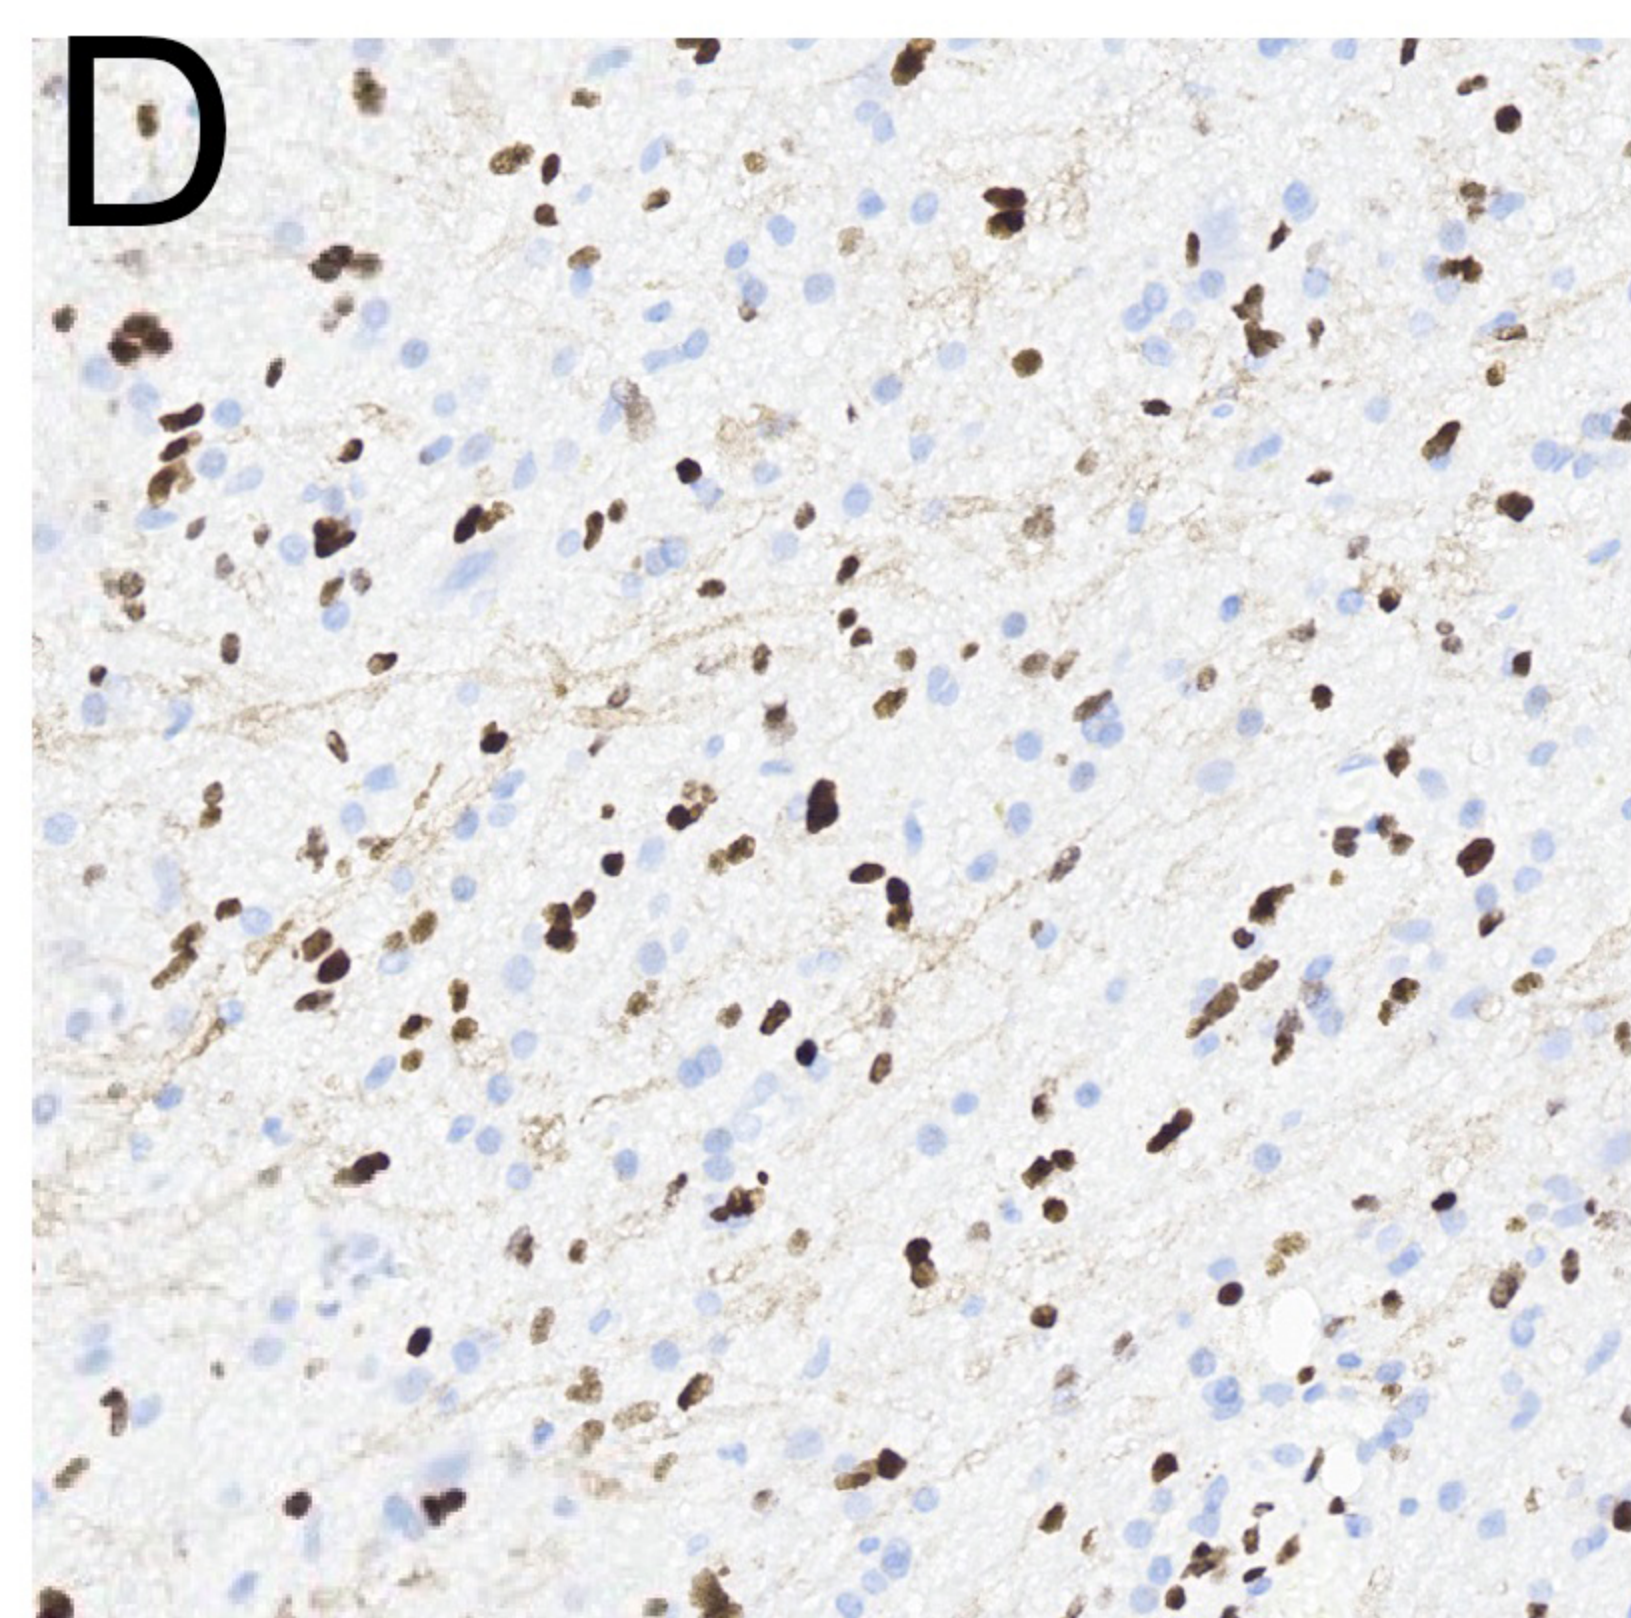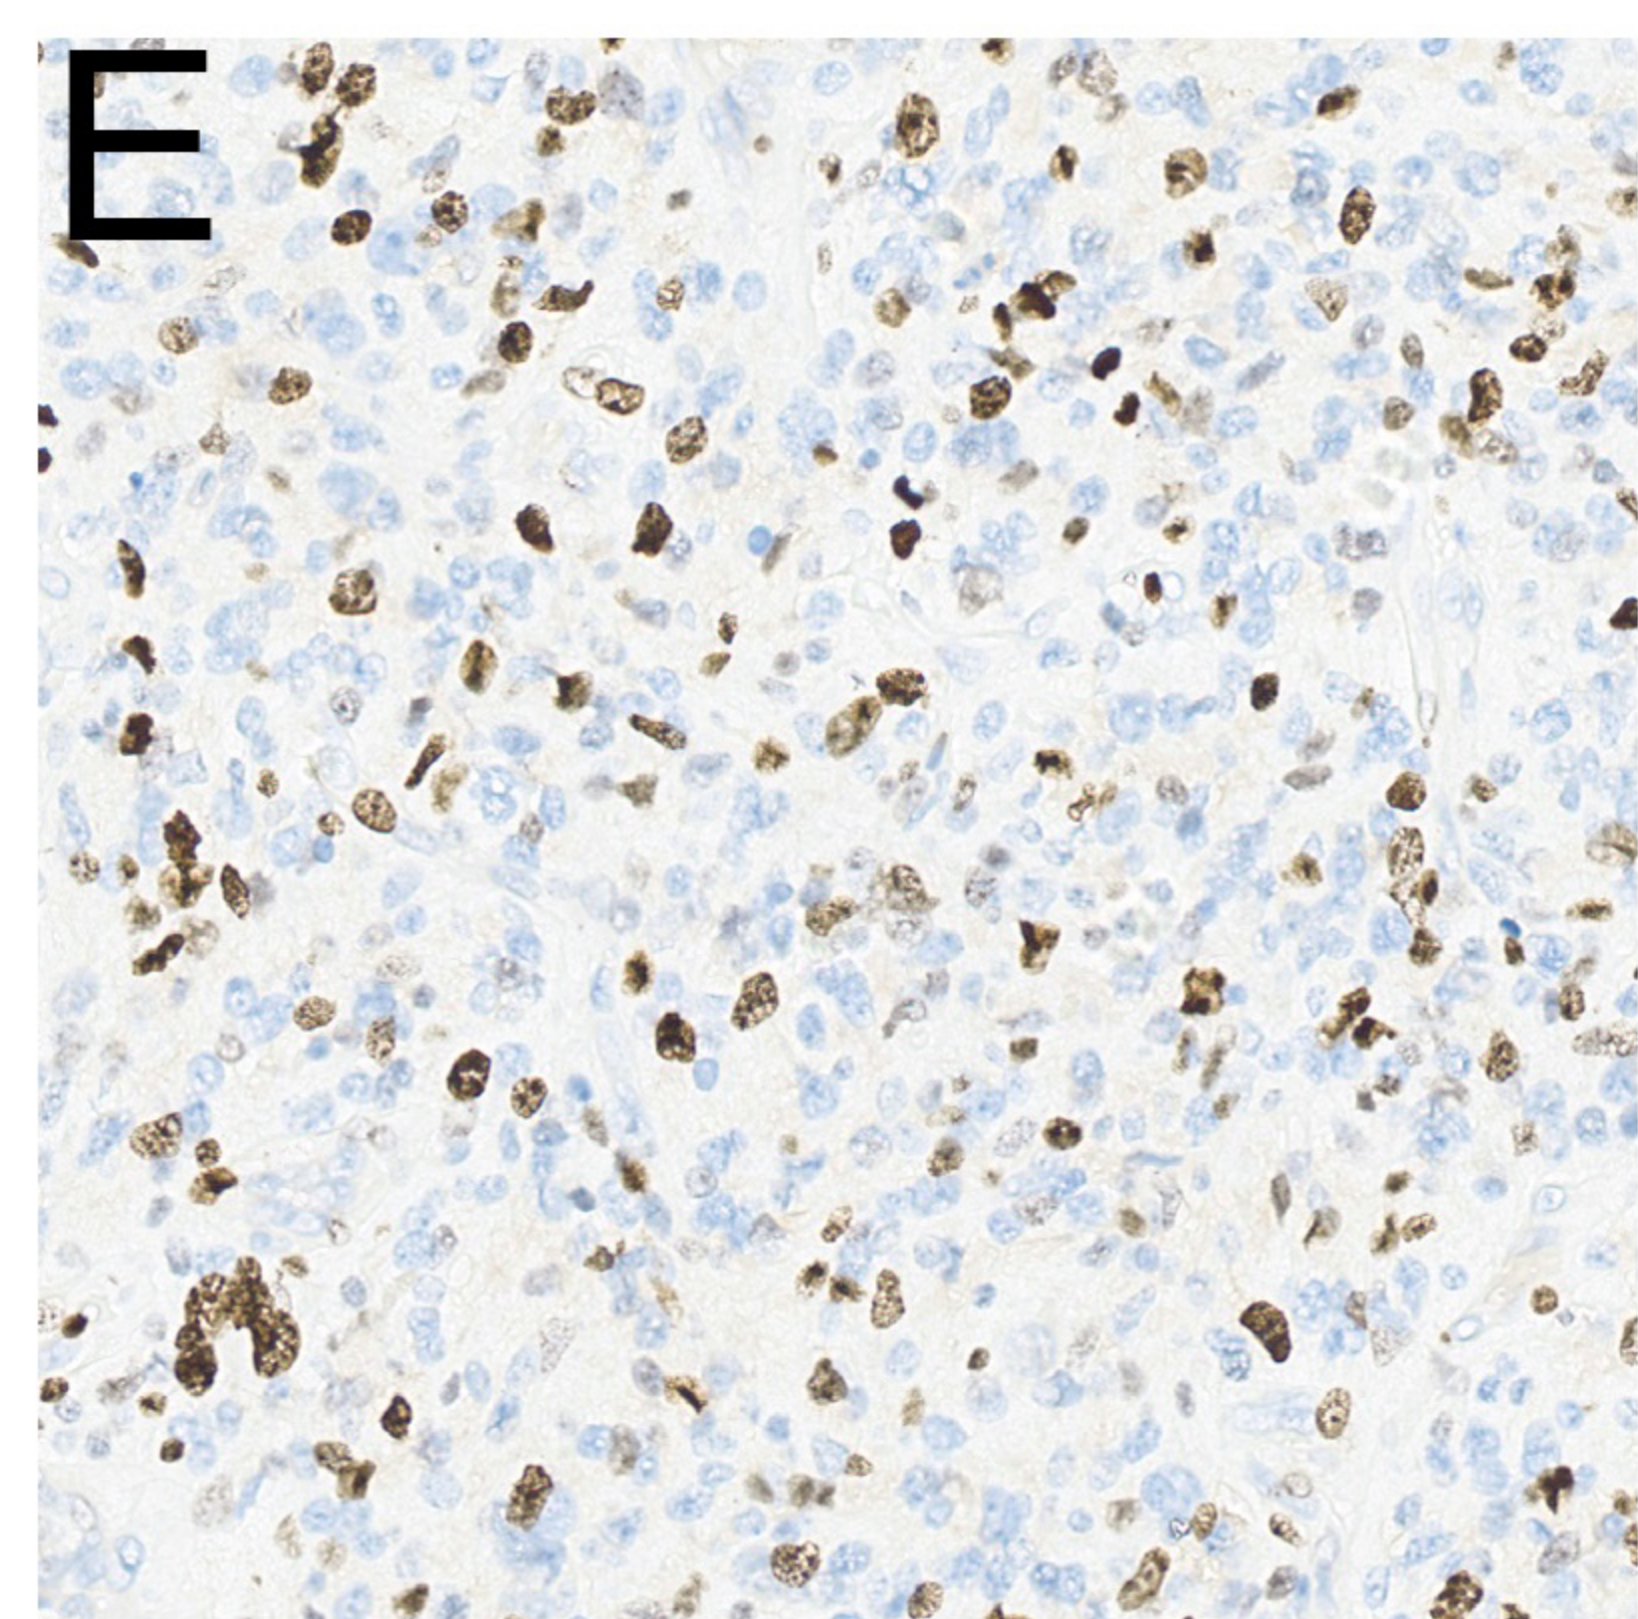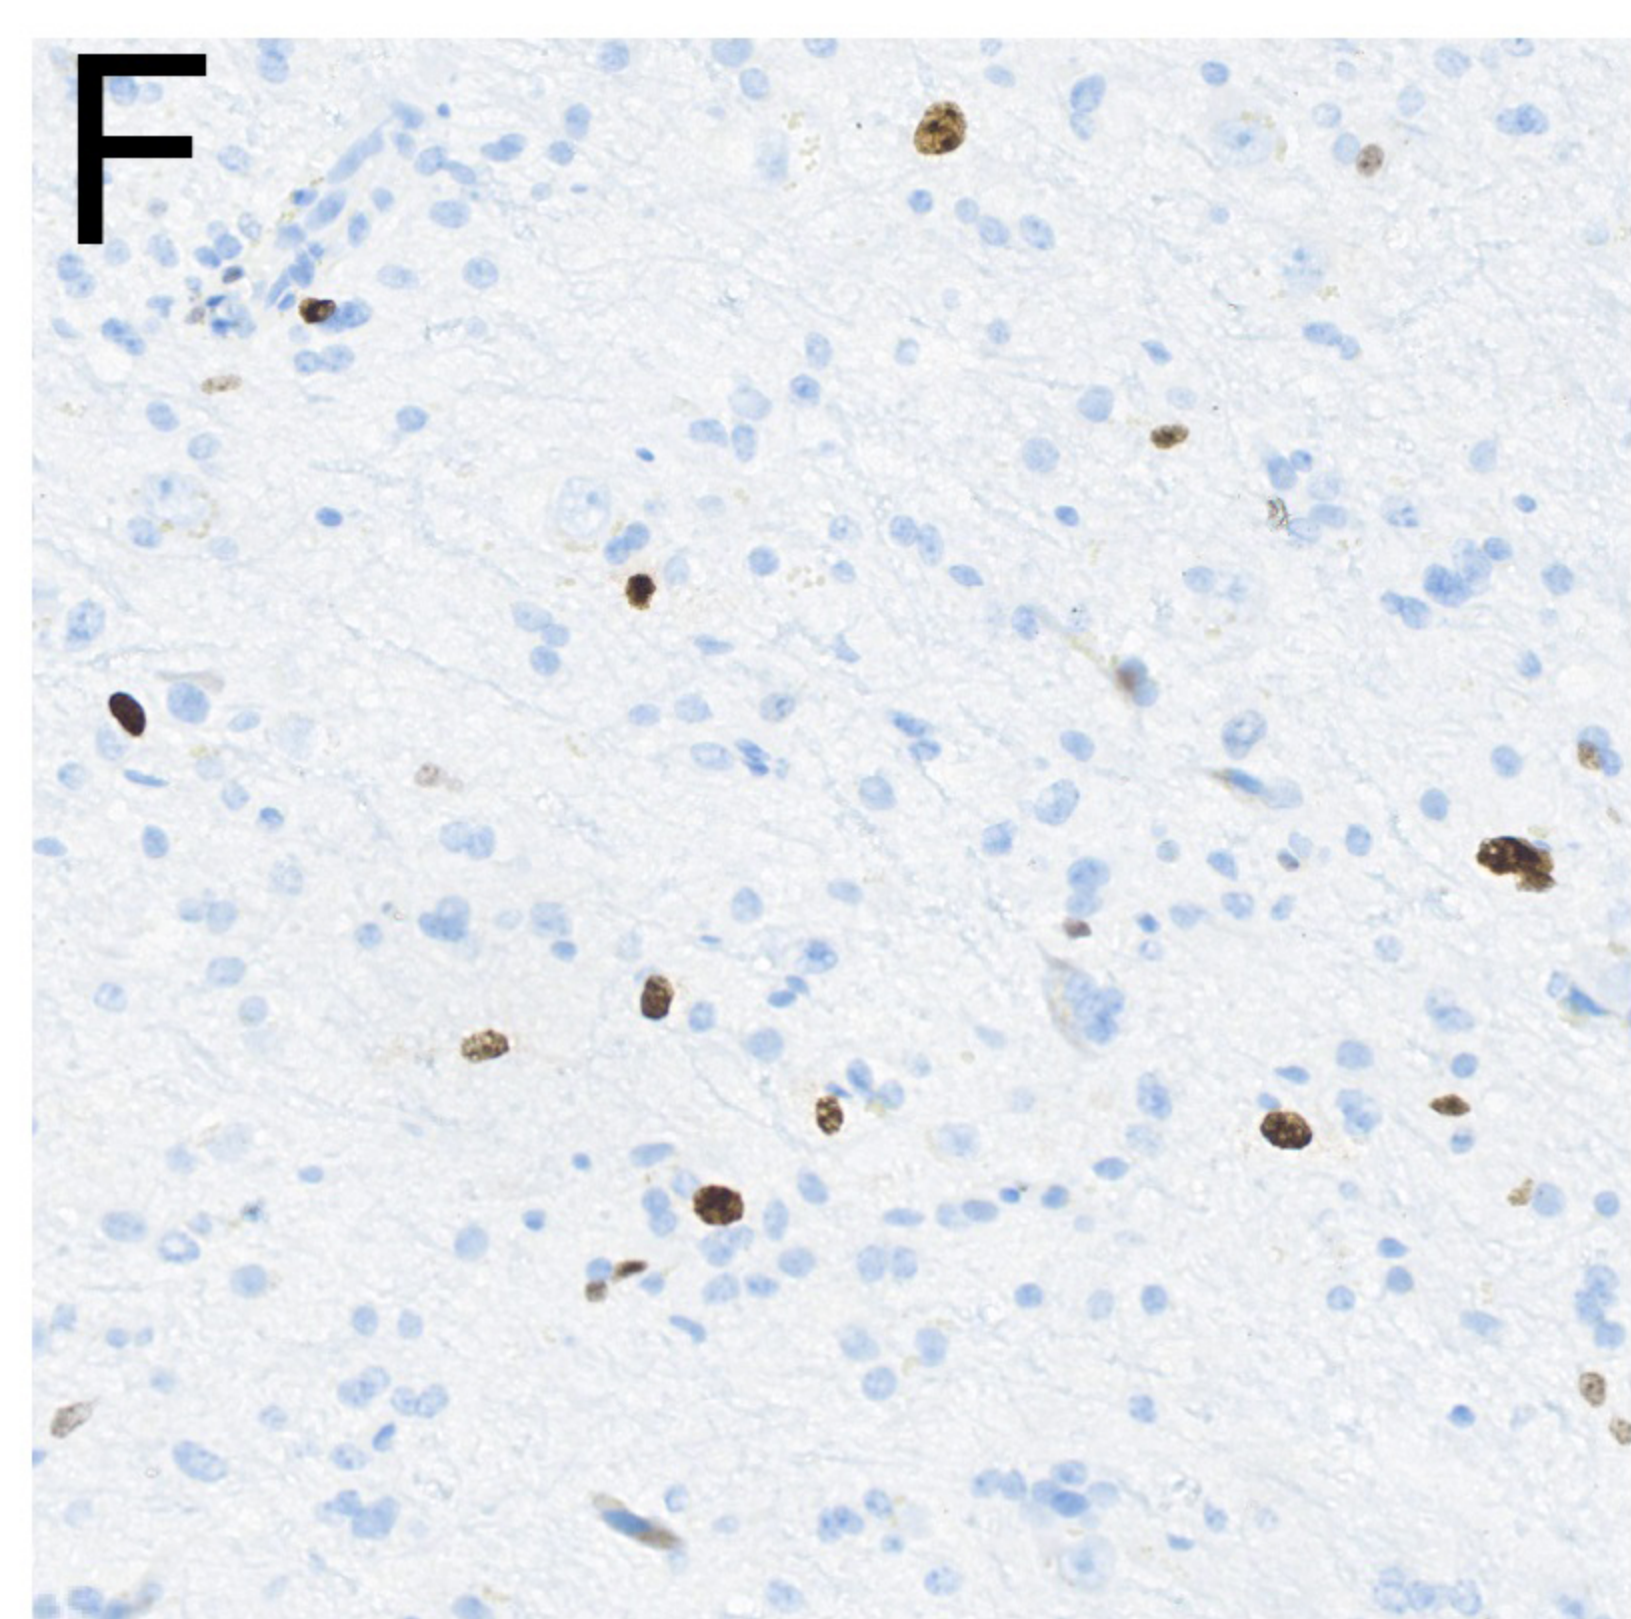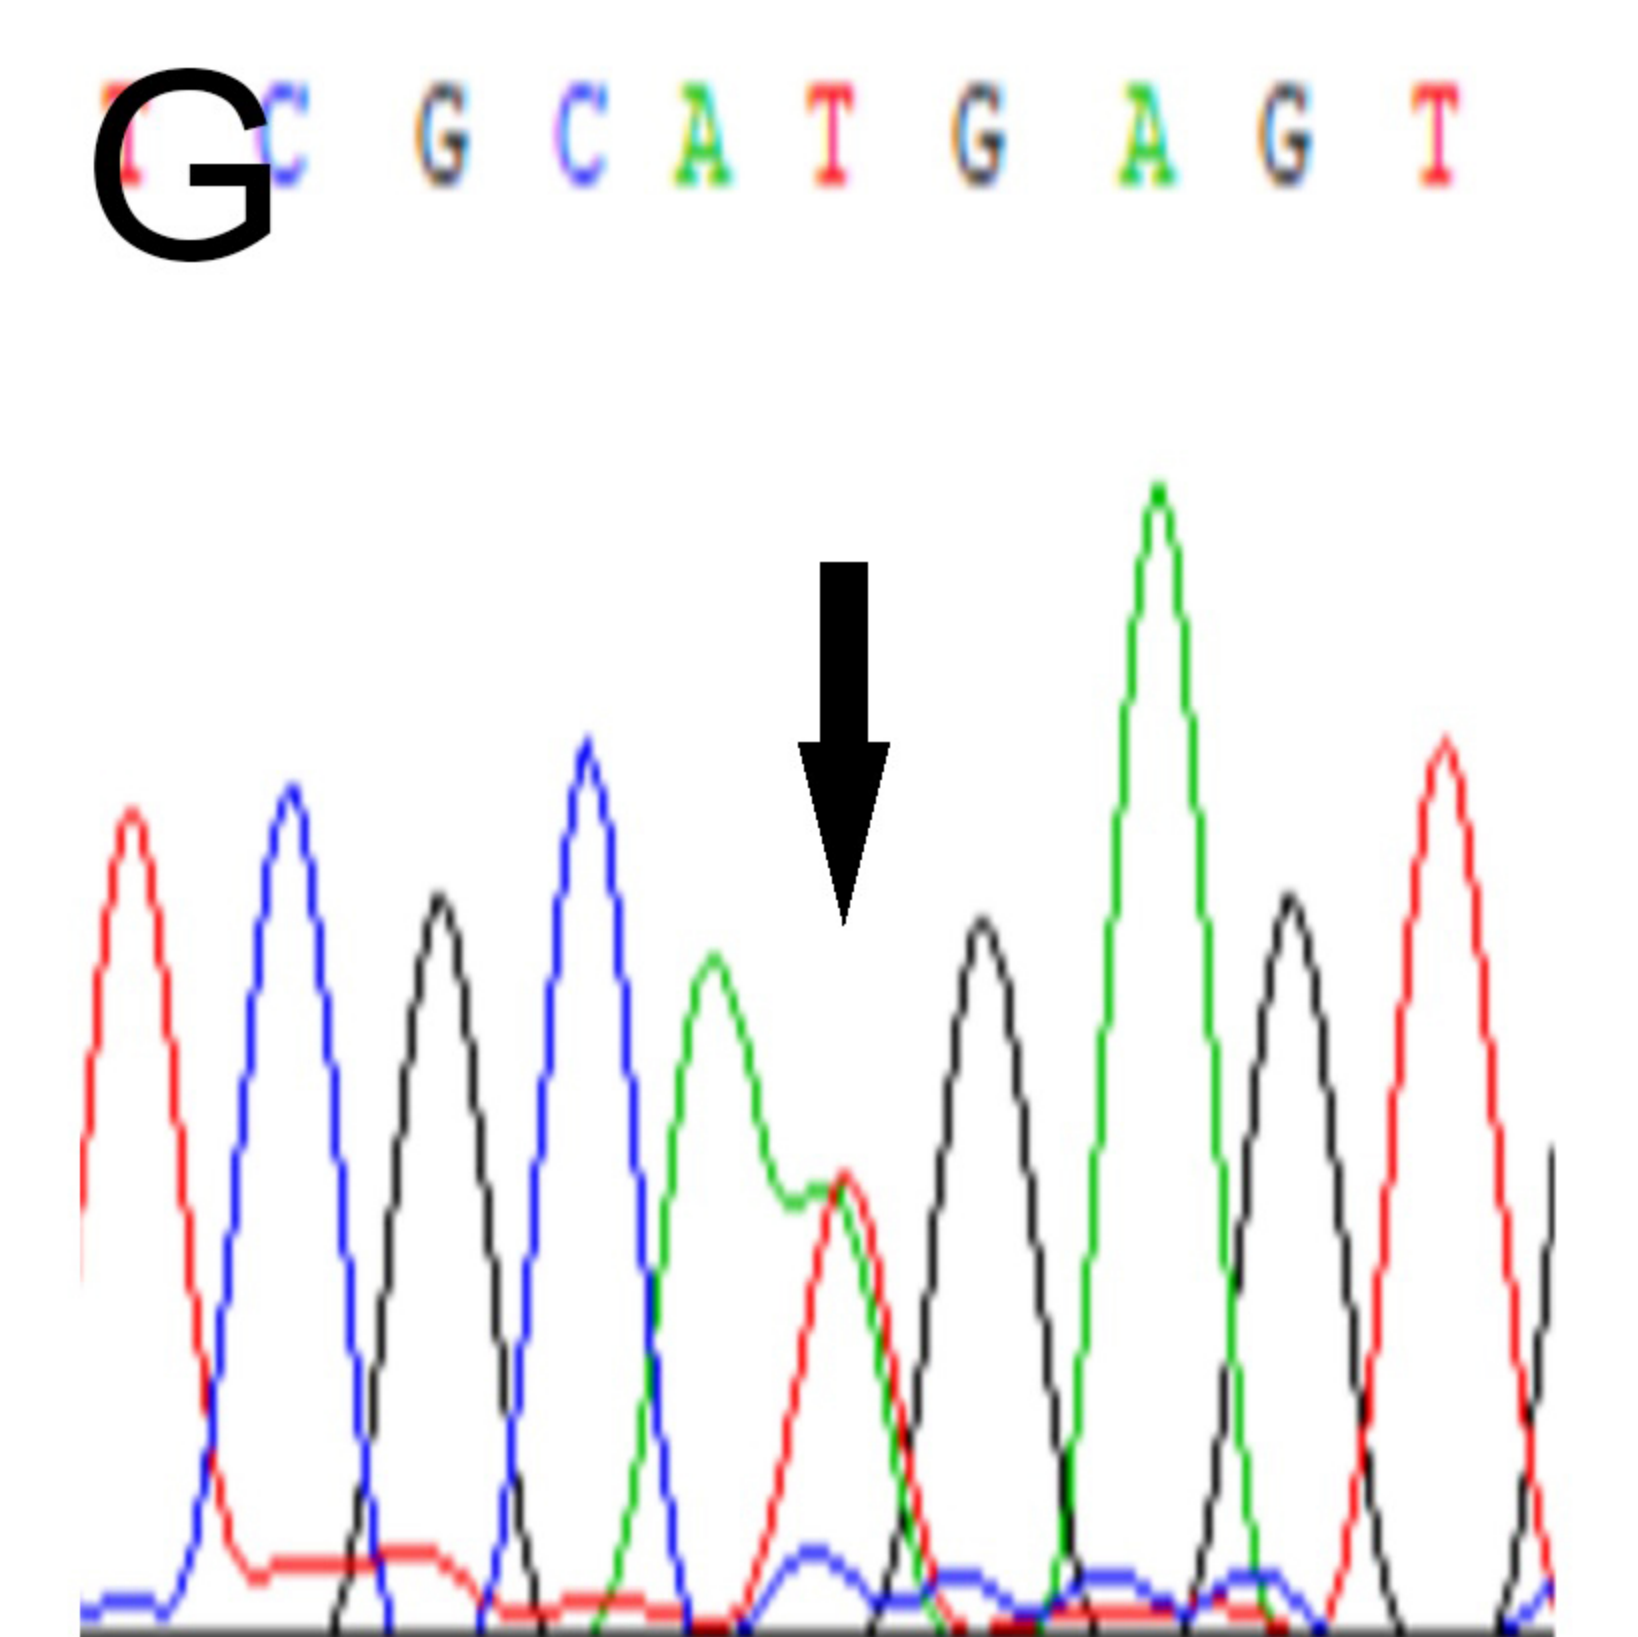

case 46

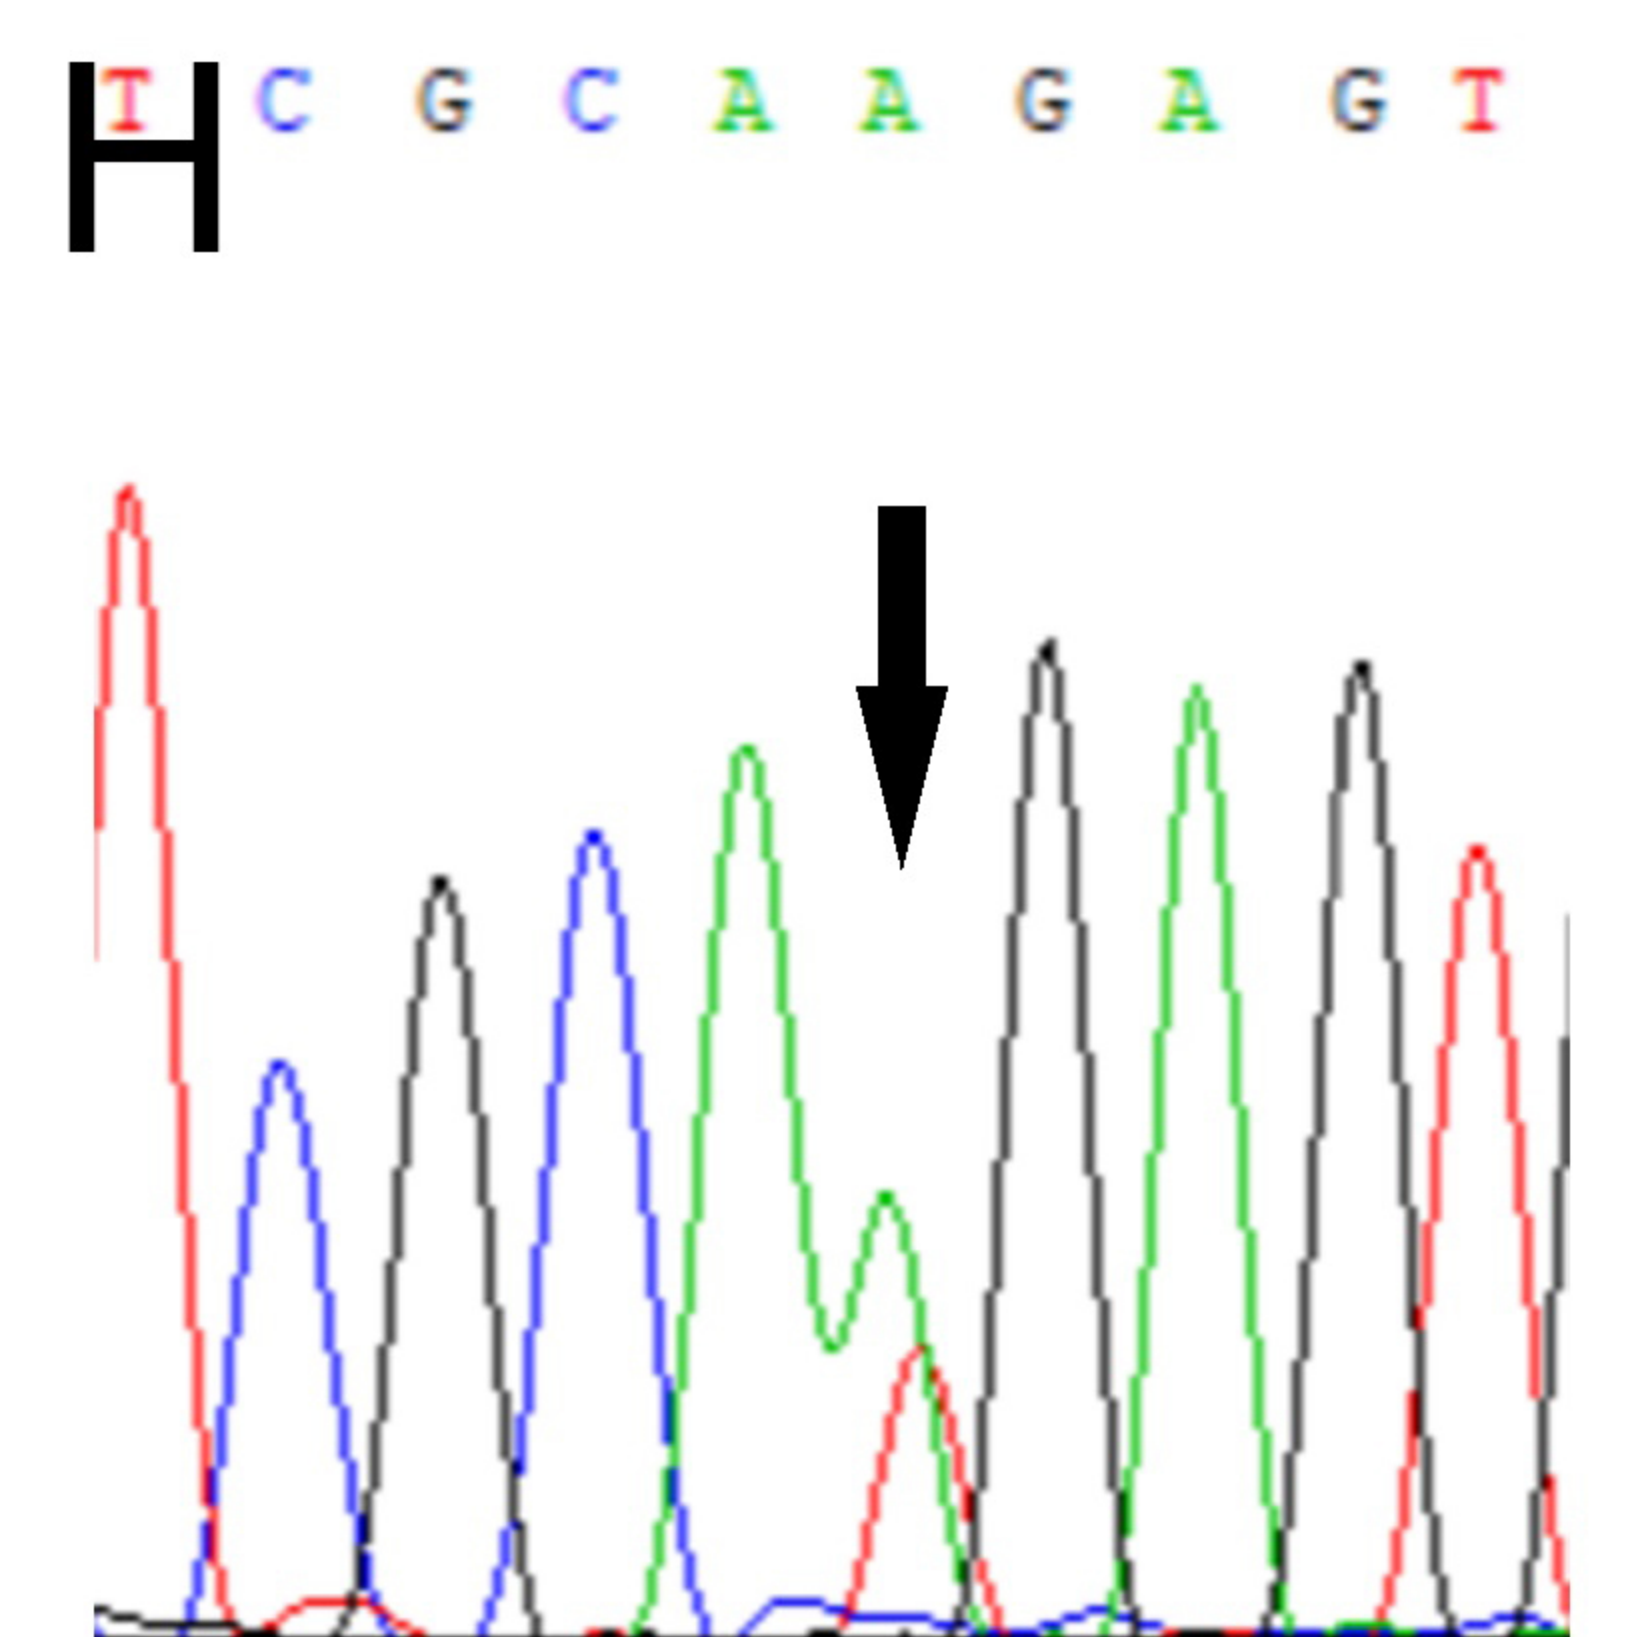

case 42

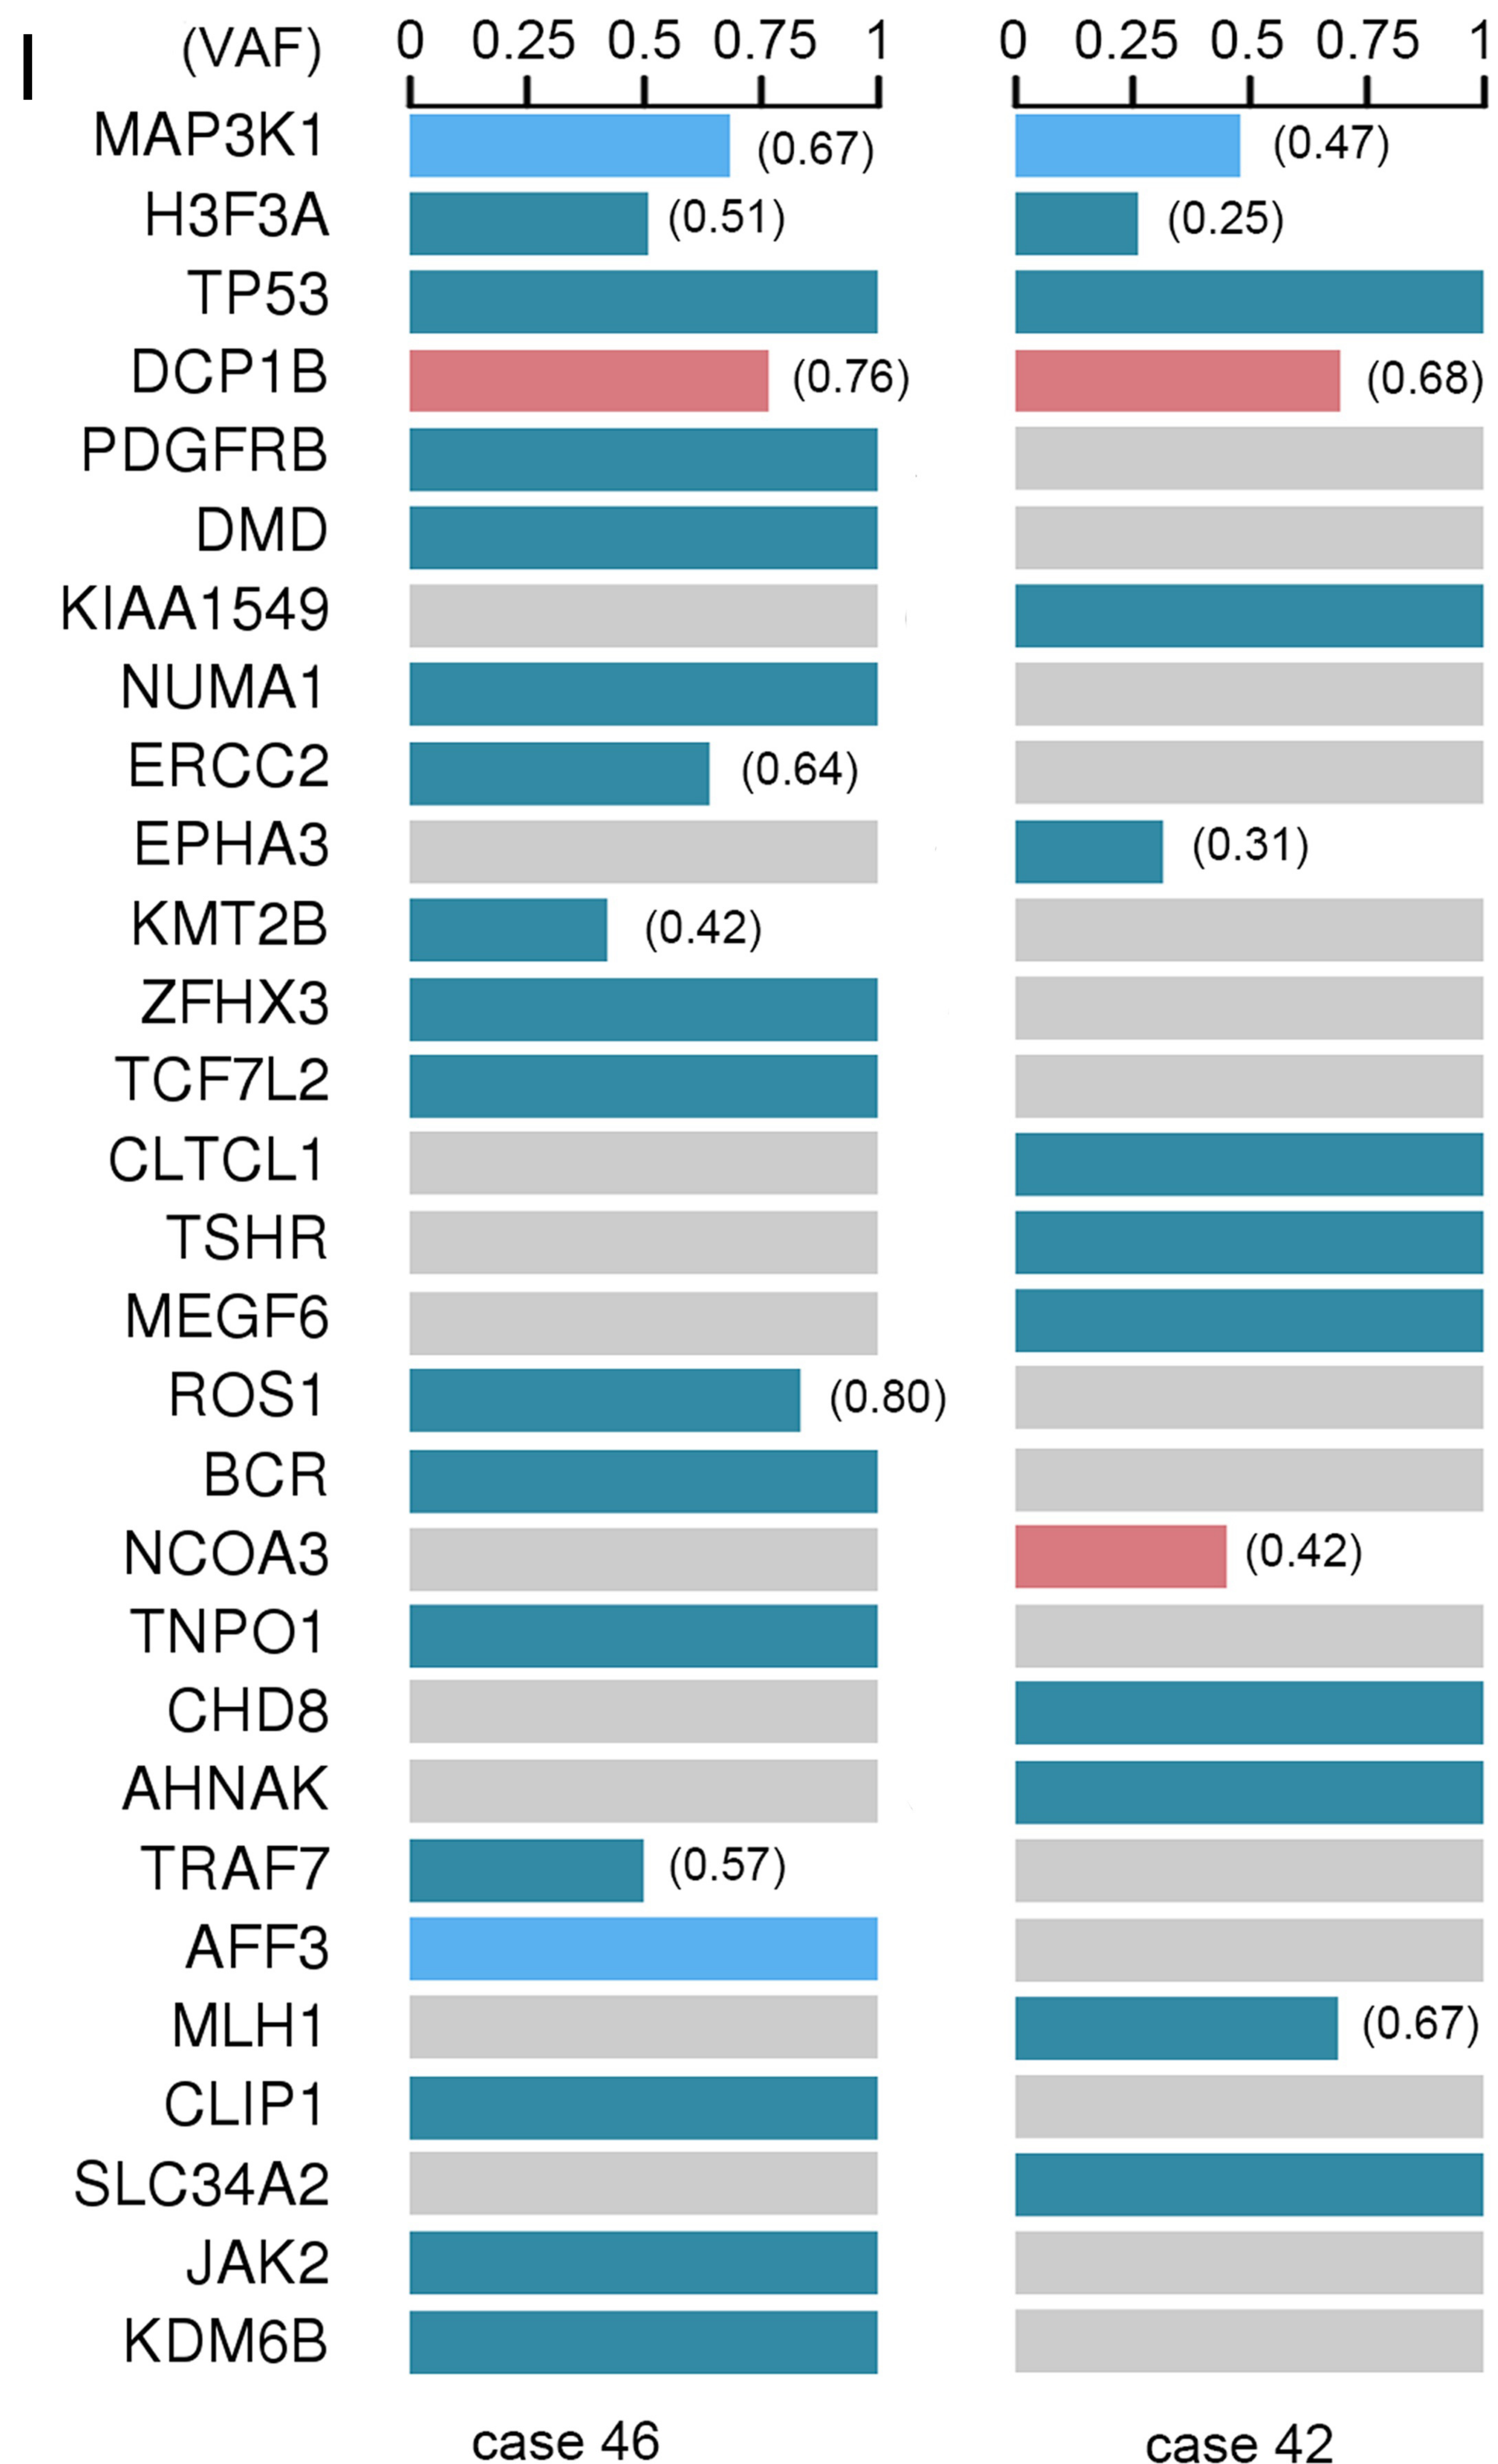

**Mutation type**  
 ■ Missense Mutation  
 ■ In Frame Ins  
 ■ In Frame Del  
 ■ No Mutation

case 46

case 42

Supplement: pas-46-863-s001.pdf [file pas-46-863-s001.pdf]
